# Supplementary material for: Metabolic trade-offs favor regulated hypothermia and inhibit fever in immune-challenged chicks
Source: Oxford University Press journal article supplement (doi:10.1242/jeb.243115), 2022-01-31
Supplement: jeb243115supp.pdf [file jeb243115supp.pdf]

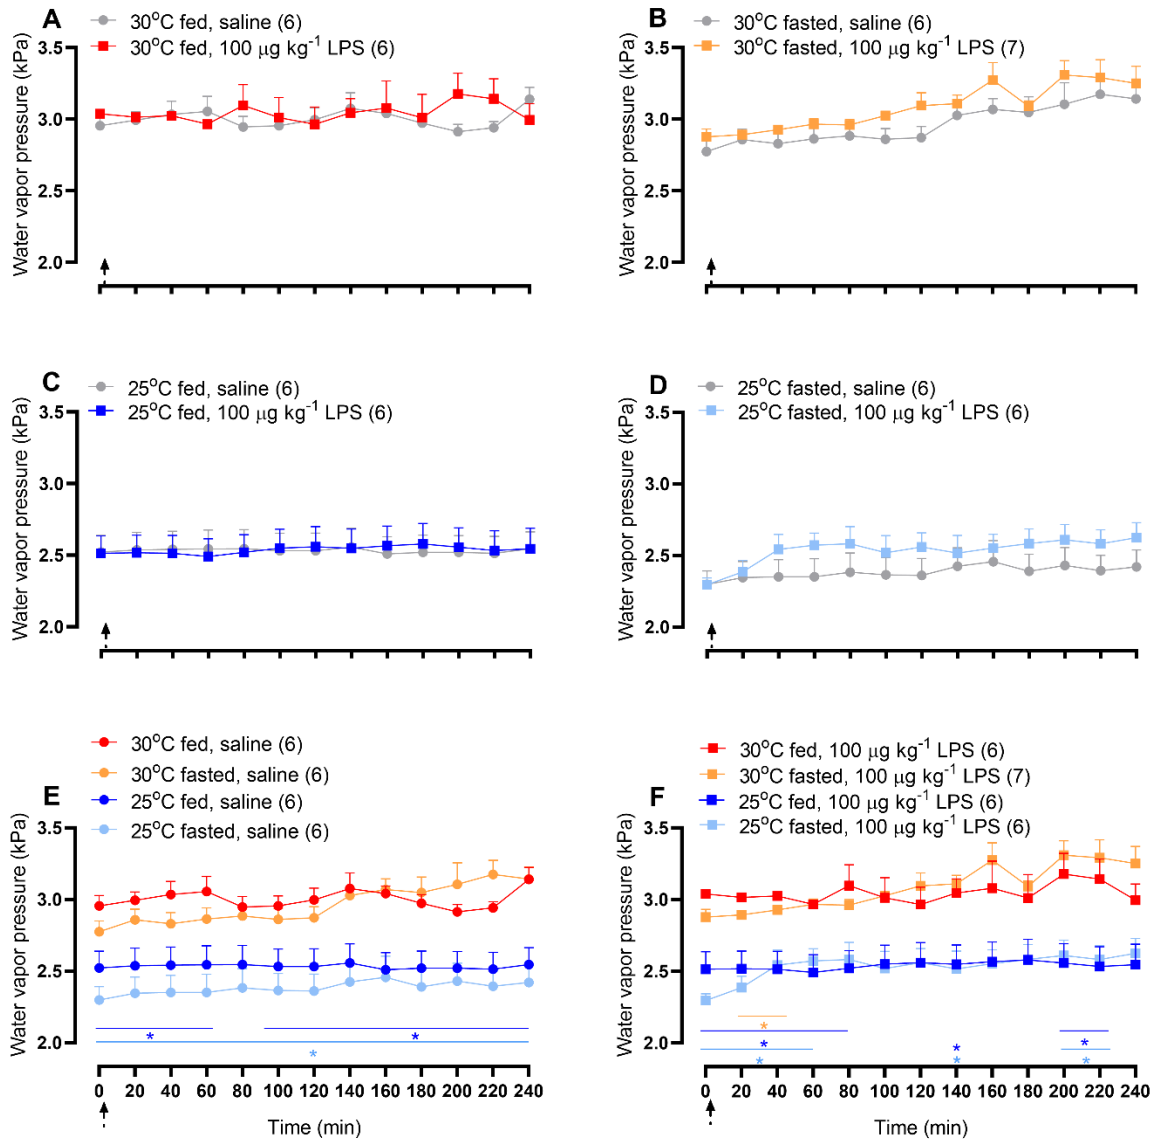

**Fig. S1.** Water vapor pressure in the chamber of immune challenged chicks exposed to different ambient conditions. Top and middle panels – LPS and saline injected chicks fed at 30°C (A), fasted at 30°C (B), fed at 25°C (C), and fasted at 25°C (D). Bottom panels - different ambient conditions effects in chicks treated with saline (E) or LPS (F). Data are means  $\pm$  SEM. Number of subjects is shown in parenthesis. Dashed arrows indicate injection time. No difference was observed between LPS and saline treatments or due to feeding or fasting protocol. Differences in water vapor pressure induced by temperature can be observed in the bottom panels. Two-way RM ANOVA followed by Tukey post hoc test was used for comparisons. \*, \* and \* respectively represent differences from the conditions 30°C fasted, 25°C fed, and 25°C fasted to fed chicks at 30°C (control for ambient conditions).
